# Supplementary material for: MicroRNA-146 function in the innate immune transcriptome response of zebrafish embryos to Salmonella typhimurium infection
Source: PubMed Central journal article supplement (PMC3852110; doi:10.1186/1471-2164-14-696), 2013-10-10

## A stem-loop dre-miR-146a

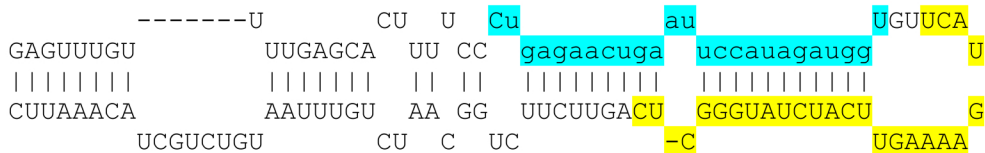

## B stem-loop dre-miR-146b

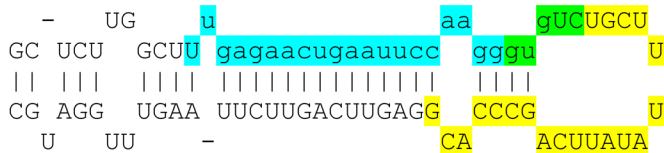

Supplement: 1471-2164-14-696-S1.pdf [file 1471-2164-14-696-S1.pdf]
