# Supplementary material for: MicroRNA-146 function in the innate immune transcriptome response of zebrafish embryos to Salmonella typhimurium infection
Source: PubMed Central journal article supplement (PMC3852110; doi:10.1186/1471-2164-14-696), 2013-10-10

Fold change

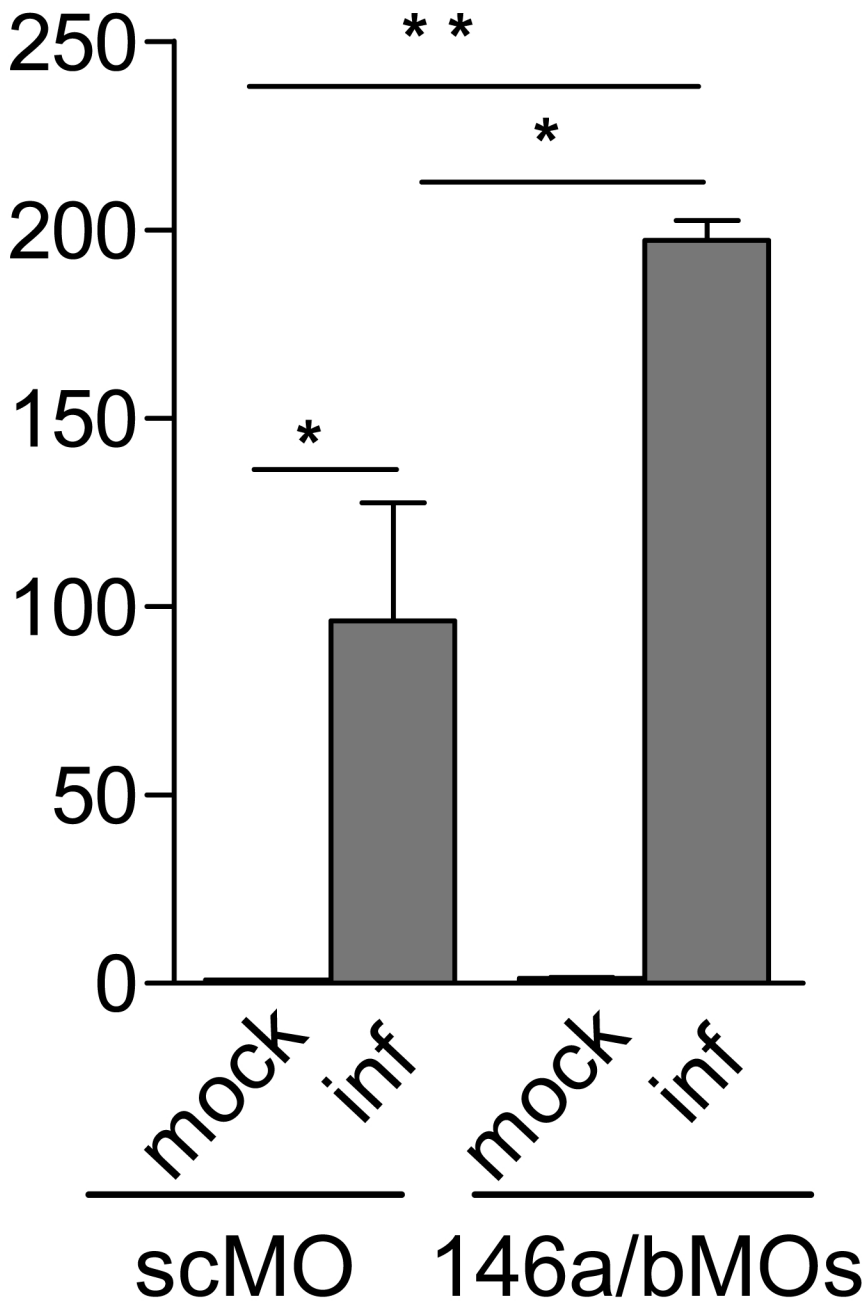

Supplement: 1471-2164-14-696-S5.pdf [file 1471-2164-14-696-S5.pdf]
